# Supplementary material for: Nitrergic Pathway Is the Main Contributing Mechanism in the Human Gastric Fundus Relaxation: An In Vitro Study
Source: PLoS One. 2016 Sep 2;11(9):e0162146. doi: 10.1371/journal.pone.0162146 (PMC5010257; doi:10.1371/journal.pone.0162146)
Supplement: S1 Dataset — (XLSX) [file pone.0162146.s001.xlsx]

## Sheet: Spontaneous (Circular)
	Study number	control	Atropine	Atropine + MRS2500	Atropine + MRS2500 + L-NNA	Atropine + MRS2500 + L-NNA + TTX		control	Atropine	Atropine + MRS2500	Atropine + MRS2500 + L-NNA	Atropine + MRS2500 + L-NNA + TTX		control	Atropine	Atropine + MRS2500	Atropine + MRS2500 + L-NNA	Atropine + MRS2500 + L-NNA + TTX		control	Atropine	Atropine + MRS2500	Atropine + MRS2500 + L-NNA	Atropine + MRS2500 + L-NNA + TTX
		Tone						Peak						Amplitude						Frequency
	1	0.59	0.6	0.62	0.68	0.71		0.63	0.64	0.66	0.73	0.76		0.04	0.05	0.05	0.05	0.05		6.2	7	7.1	7.1	7
	2	0.51	0.5	0.55	0.76	0.78		0.53	0.52	0.57	0.78	0.81		0.02	0.02	0.03	0.03	0.04		5.8	6	5.6	5.6	5.6
	3	0.54	0.61	0.7	1.07	0.96		0.65	0.72	0.81	1.17	1.07		0.12	0.12	0.12	0.09	0.1		4.8	5	5.3	5.6	5.8
	4	0.01	0	0	0.22	0.26		0.03	0.03	0.02	0.22	0.26		-	-	-	-	-		-	-	-	-	-
	5	0	0	0	0.21	0.26		0.02	0.03	0.02	0.24	0.29		0.02	0.03	0.02	0.02	0.02		4.8	4.9	5	5	4.9
	6	0.57	0.57	0.6	0.69	0.69		0.61	0.61	0.63	0.74	0.75		0.02	0.04	0.04	0.05	0.03		10.6	9.5	8.4	7.6	7.2
	7	0.4	0.43	0.43	0.52	0.59		0.49	0.47	0.46	0.54	0.61		0.09	0.04	0.02	0.01	0.02		3.4	4.1	4.8	5.4	5.7
	8	0.31	0.3	0.29	0.32	0.3		0.35	0.34	0.33	0.35	0.35		0.04	0.04	0.04	0.03	0.05		5.5	6	5.5	6	6
	9	0.28	0.3	0.3	0.4	0.35		0.42	0.45	0.46	0.54	0.5		0.14	0.15	0.16	0.14	0.152		4.5	4.5	4.5	4.5	4.5
	10	0.34	0.35	0.35	0.45	0.4		0.4	0.43	0.45	0.52	0.5		0.06	0.08	0.1	0.07	0.1		5	5	5	5	5
	11	0.38	0.39	0.4	0.43	0.42		0.4	0.41	0.41	0.45	0.45		0.02	0.02	0.01	0.02	0.03		4	4	4	4	4
	12	0.35	0.28	0.28	0.28	0.27		0.6	0.33	0.3	0.3	0.29		0.02	0.05	0.02	0.02	0.02		5	5	5	5	5
mean		0.3567	0.3608	0.3767	0.5025	0.4992		0.4275	0.415	0.4267	0.5483	0.5533		0.0536	0.0582	0.0555	0.0482	0.0556		5.4182	5.5455	5.4727	5.5273	5.5182
median		0.365	0.37	0.375	0.44	0.41		0.455	0.44	0.455	0.53	0.5		0.04	0.04	0.04	0.03	0.04		5	5	5	5.4	5.6
SD		0.1943	0.20505	0.22447	0.2562	0.23842		0.21312	0.21458	0.23788	0.27376	0.25224		0.04388	0.04191	0.04906	0.03894	0.04319		1.88829	1.58263	1.24506	1.06027	0.98165
SEM		0.05609	0.05919	0.0648	0.07396	0.06883		0.06152	0.06194	0.06867	0.07903	0.07281		0.01323	0.01264	0.01479	0.01174	0.01302		0.56934	0.47718	0.3754	0.31968	0.29598

## Sheet: Spontaneous (Longitudinal)
	Study number	control	Atropine	Atropine + MRS2500	Atropine + MRS2500 + L-NNA	Atropine + MRS2500 + L-NNA + TTX		control	Atropine	Atropine + MRS2500	Atropine + MRS2500 + L-NNA	Atropine + MRS2500 + L-NNA + TTX		control	Atropine	Atropine + MRS2500	Atropine + MRS2500 + L-NNA	Atropine + MRS2500 + L-NNA + TTX		control	Atropine	Atropine + MRS2500	Atropine + MRS2500 + L-NNA	Atropine + MRS2500 + L-NNA + TTX
		Tone						Peak						Amplitude						Frequency
	1	0.55	0.6	0.59	0.64	0.6		0.83	0.81	0.8	0.83	0.85		0.34	0.35	0.38	0.31	0.34		4.9	5	5.7	6.6	6
	2	0.9	0.99	0.98	1.11	1.07		1.08	1.15	1.12	1.25	1.19		0.19	0.2	0.18	0.16	0.18		4.3	4.6	4.6	4.6	4.7
	3	0.79	1.23	1.18	1.63	1.38		1.38	1.74	1.67	2.02	1.89		0.6	0.59	0.5	0.45	0.54		4.3	4.7	4.94	5	4.9
	4	1.23	1.25	1.29	1.53	1.41		1.4	1.43	1.46	1.63	1.55		0.17	0.18	0.18	0.1	0.14		3.8	3.9	3.9	3.9	4.1
	5	-	-	-	-	-		1.26	1.3	1.35	1.52	1.54		-	-	-	-	-		-	-	-	-	-
	6	0.4	0.41	0.41	0.49	0.5		0.52	0.54	0.57	0.63	0.64		0.12	0.1	0.22	0.17	0.17		9.8	9	9	9	9.6
	7	0.52	0.64	0.66	0.81	0.8		0.84	0.92	0.85	0.9	0.92		0.34	0.36	0.25	0.08	0.14		3.6	4.1	4.3	4.5	4.5
	8	0.45	0.51	0.63	0.77	0.76		0.77	0.73	0.76	0.86	0.85		0.33	0.21	0.14	0.17	0.14		3.6	3.9	4.4	4.6	4.4
	9	1.5	1.75	1.82	2.12	2		1.91	2.07	2.13	2.36	2.29		0.42	0.36	0.32	0.24	0.29		3.5	3.5	3.5	3.5	4
	10	0.5	0.5	0.5	0.63	0.6		0.76	0.78	0.8	0.97	0.96		0.26	0.28	0.3	0.34	0.36		4	4.5	4.5	4.5	4.5
	11	0.4	0.4	0.44	0.5	0.46		0.57	0.6	0.62	0.67	0.65		0.17	0.2	0.17	0.17	0.19		5	5	5.5	5	5
	12	0.45	0.46	0.46	0.52	0.52		0.49	0.5	0.5	0.56	0.56		0.04	0.04	0.04	0.04	0.04		4.5	4.5	4.5	4.5	4.5
	13	0.43	0.46	0.5	0.6	0.55		0.6	0.65	0.66	0.76	0.74		0.17	0.19	0.16	0.16	0.19		4.5	4.5	4.5	4.5	4.5
mean		0.6767	0.7667	0.7883	0.9458	0.8875		0.9546	1.0169	1.0223	1.1508	1.1254		0.2625	0.255	0.2367	0.1992	0.2267		4.65	4.7667	4.945	5.0167	5.0583
median		0.51	0.555	0.61	0.705	0.68		0.83	0.81	0.8	0.9	0.92		0.225	0.205	0.2	0.17	0.185		4.3	4.5	4.5	4.55	4.5
SD		0.36122	0.43648	0.43958	0.53641	0.48219		0.42624	0.49109	0.49353	0.56867	0.53606		0.15256	0.14526	0.12287	0.11743	0.13425		1.69679	1.40863	1.41187	1.45654	1.51925
SEM		0.10427	0.126	0.1269	0.15485	0.1392		0.11822	0.1362	0.13688	0.15772	0.14868		0.04404	0.04193	0.03547	0.0339	0.03876		0.48982	0.40664	0.40757	0.42047	0.43857

## Sheet: EFS (Circular)
	Study number	control	Atropine	Atropine + MRS2500	Atropine + MRS2500 + L-NNA	Atropine + MRS2500 + L-NNA + TTX		control	Atropine	Atropine + MRS2500	Atropine + MRS2500 + L-NNA	Atropine + MRS2500 + L-NNA + TTX
		Peak (1 min)						Nadir (1 min)
	1	0.16	0.05	0.04	0.07	0.09		-0.14	-0.22	-0.24	0.01	0.03
	2	0.06	0.02	0.03	0.02	0.02		-0.05	-0.09	-0.11	0	0
	3	0.13	0.06	0.1	0.17	0.1		-0.15	-0.26	-0.35	-0.04	-0.01
	4	0.02	0.01	0.01	0.01	0.01		-0.23	-0.33	-0.34	0	0
	5	0.02	0.01	0.03	0.06	0.04		-0.1	-0.15	-0.15	0.02	0.01
	6	0.03	0.01	0.04	0.21	0.07		-0.24	-0.26	-0.26	0.08	0
	7	0.33	0.01	0.01	0.03	0.03		-0.13	-0.26	-0.28	0.02	0
	8	0.03	0.02	0.03	0.03	0.04		-0.08	-0.09	-0.1	0	0
	9	0.12	0.16	0.17	0.14	0.15		0	-0.02	-0.03	0	0
	10	0.28	0.07	0.09	0.07	0.09		-0.02	-0.06	-0.07	0	0
	11	0.02	0.02	0.01	0.02	0.03		-0.06	-0.07	-0.07	0	0
	12	0.01	0.05	0.02	0.02	0.02		-0.05	-0.07	-0.05	0	0
mean		0.1008	0.0408	0.0483	0.0708	0.0575		-0.1042	-0.1567	-0.1708	0.0075	0.0025
median		0.045	0.02	0.03	0.045	0.04		-0.09	-0.12	-0.13	0	0
SD		0.10825	0.04337	0.04821	0.06667	0.04245		0.07669	0.1036	0.1165	0.02734	0.00965
SEM		0.03125	0.01252	0.01392	0.01925	0.01226		0.02214	0.02991	0.03363	0.00789	0.00279

## Sheet: EFS (Longitudinal)
	Study number	control	Atropine	Atropine + MRS2500	Atropine + MRS2500 + L-NNA	Atropine + MRS2500 + L-NNA + TTX		control	Atropine	Atropine + MRS2500	Atropine + MRS2500 + L-NNA	Atropine + MRS2500 + L-NNA + TTX
		Peak (1 min)						Nadir (1 min)
	1	0.36	0.2	0.29	0.3	0.35		-0.1	-0.19	-0.2	0.02	0.01
	2	0.15	0.11	0.13	0.12	0.21		-0.47	-0.62	-0.59	0	0.05
	3	0.5	0.39	0.33	0.81	0.76		-0.45	-0.81	-0.84	-0.11	0.02
	4	0.1	0.11	0.04	0.11	0.14		-0.63	-0.79	-0.82	0	0
	5	0.03	0.01	0.03	0.04	0.05		-0.69	-0.83	-0.85	0.02	0.03
	6	0.17	0.1	0.13	0.17	0.15		-0.24	-0.34	-0.32	0	0
	7	0.09	0.18	0.19	0.16	0.14		-0.07	-0.05	-0.09	0	0.01
	8	0.25	0.26	0.07	0.09	0.18		-0.24	-0.41	-0.55	-0.23	0.03
	9	0.48	0.32	0.15	0.19	0.29		-0.35	-0.62	-0.87	0	0
	10	0.38	0.2	0.25	0.32	0.34		-0.17	-0.22	-0.2	0	0
	11	0.52	0.17	0.15	0.17	0.19		-0.14	-0.14	-0.17	-0.08	0
	12	0.04	0.02	0.02	0.04	0.02		-0.15	-0.14	-0.15	0	0
	13	0.17	0.13	0.13	0.16	0.19		-0.16	-0.21	-0.25	0	0
mean		0.2492	0.1692	0.1469	0.2062	0.2315		-0.2969	-0.4131	-0.4538	-0.0292	0.0115
median		0.17	0.17	0.13	0.16	0.19		-0.24	-0.34	-0.32	0	0
SD		0.17811	0.10905	0.09767	0.19977	0.18623		0.20402	0.28485	0.3075	0.07135	0.01625
SEM		0.0494	0.03024	0.02709	0.05541	0.05165		0.05658	0.079	0.08529	0.01979	0.00451
